# Supplementary material
Source: PubMed Central journal article supplement (PMC4409929)

**A**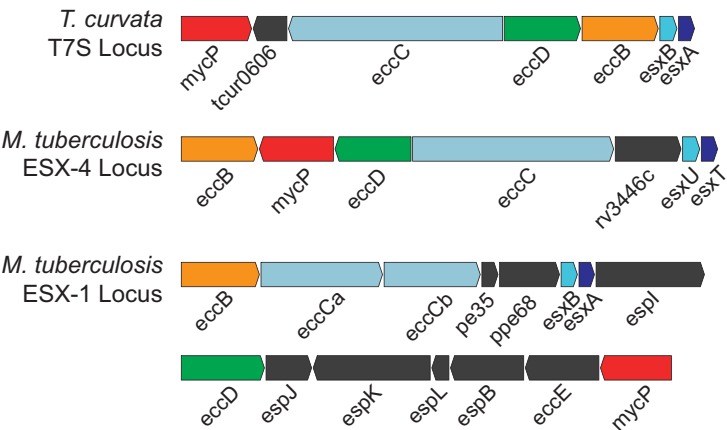**B**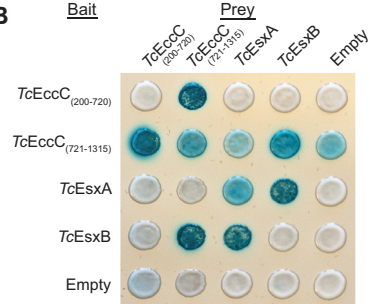**C**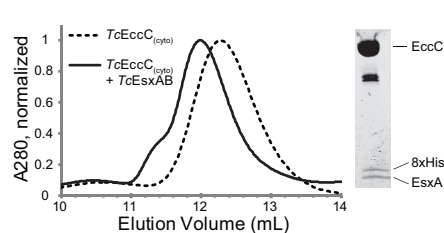**D**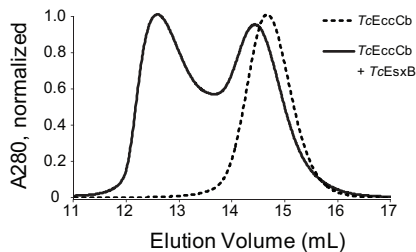**E**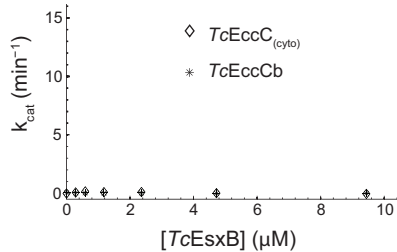**F**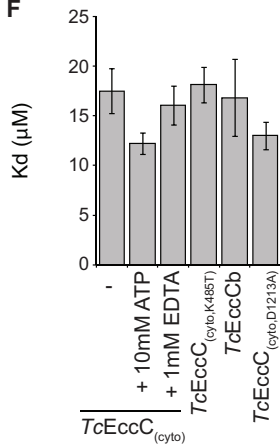

Supplement: NIHMS675969-supplement-2.pdf [file NIHMS675969-supplement-2.pdf]

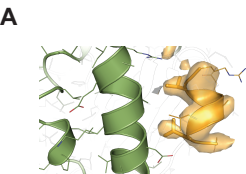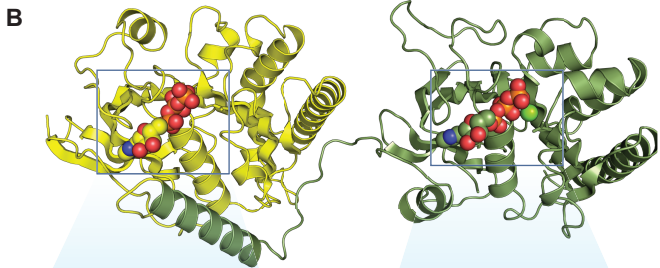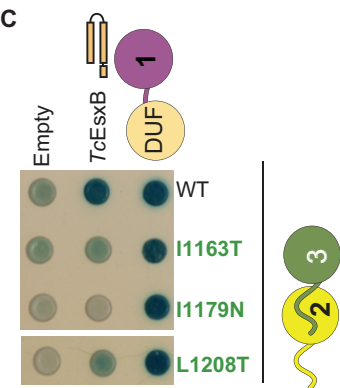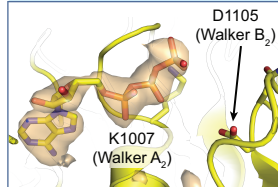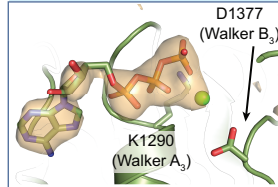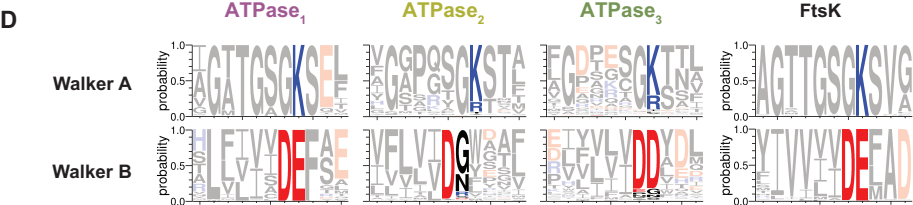

Supplement: NIHMS675969-supplement-3.pdf [file NIHMS675969-supplement-3.pdf]

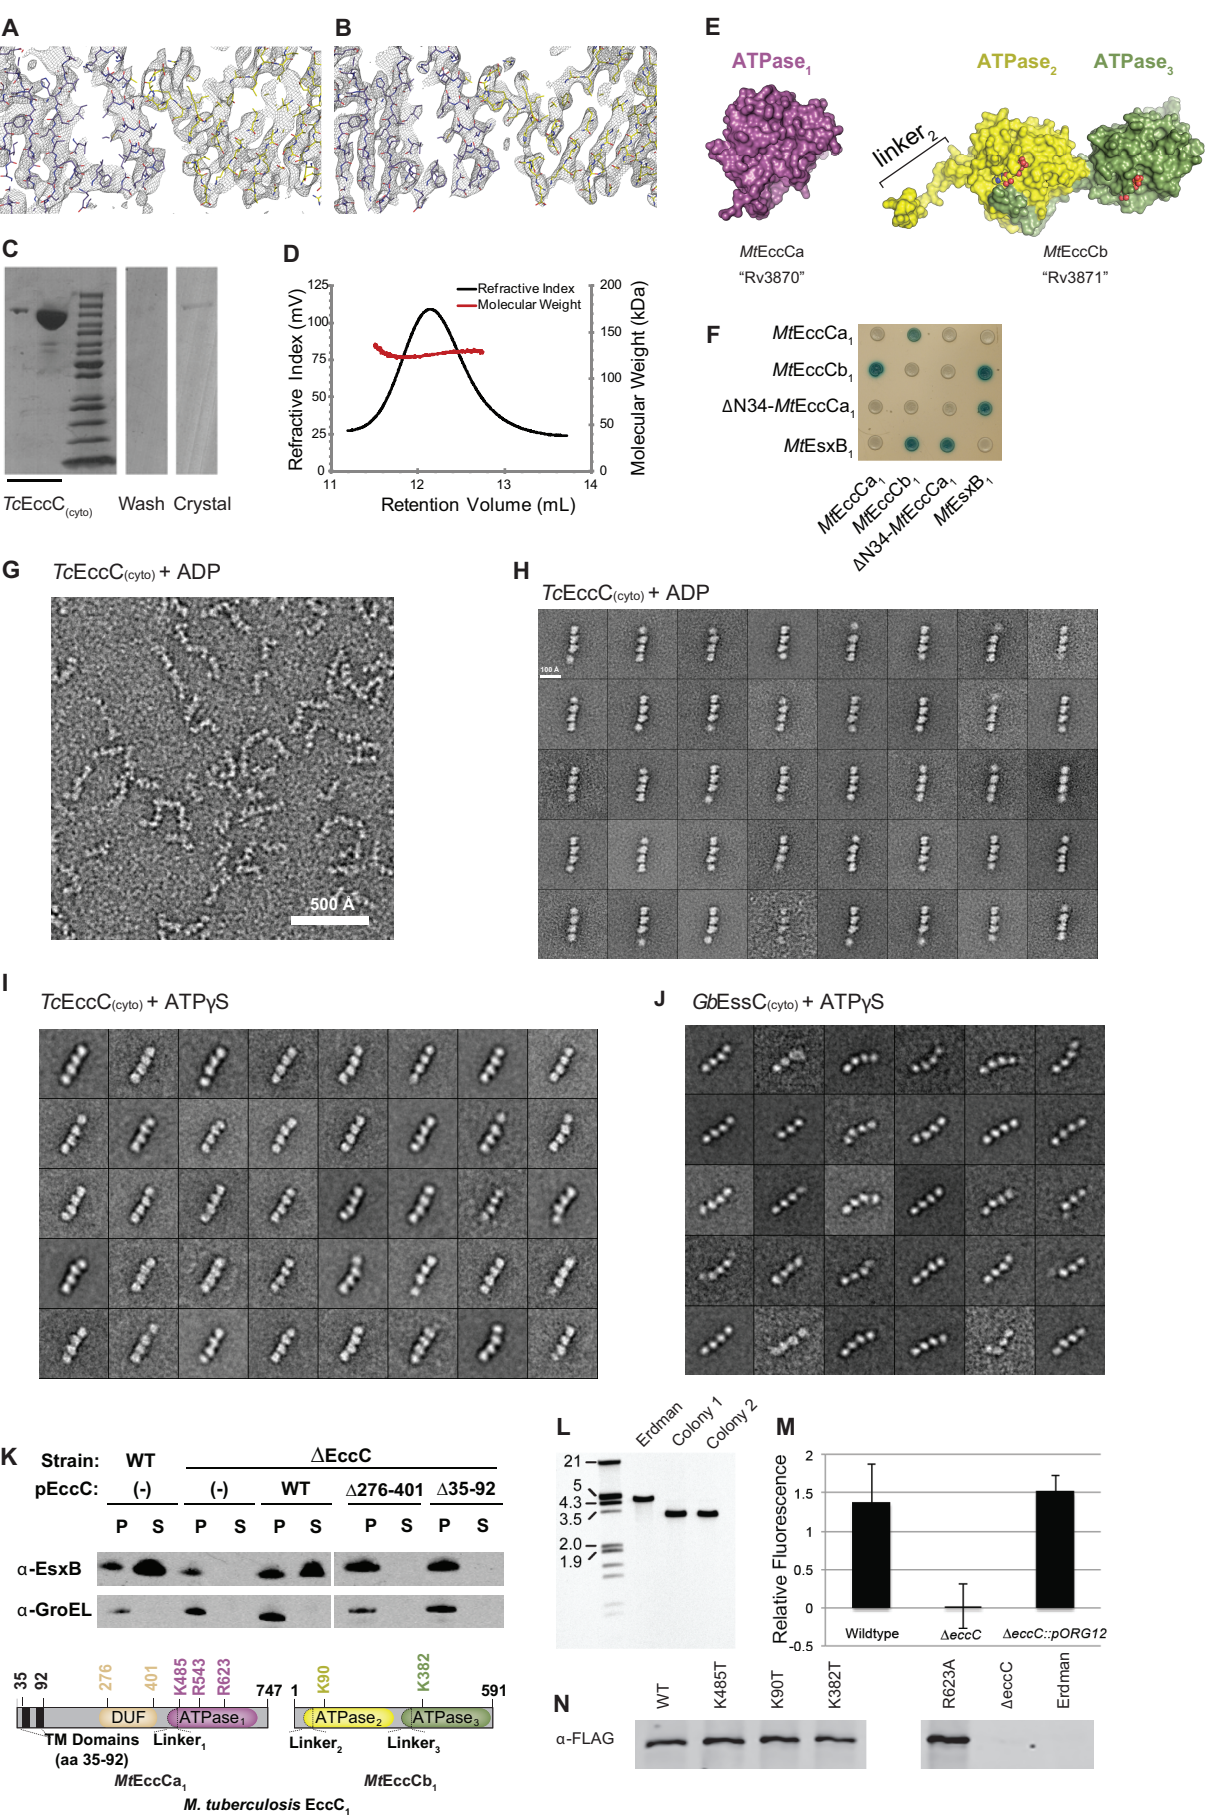

Supplement: NIHMS675969-supplement-4.pdf [file NIHMS675969-supplement-4.pdf]

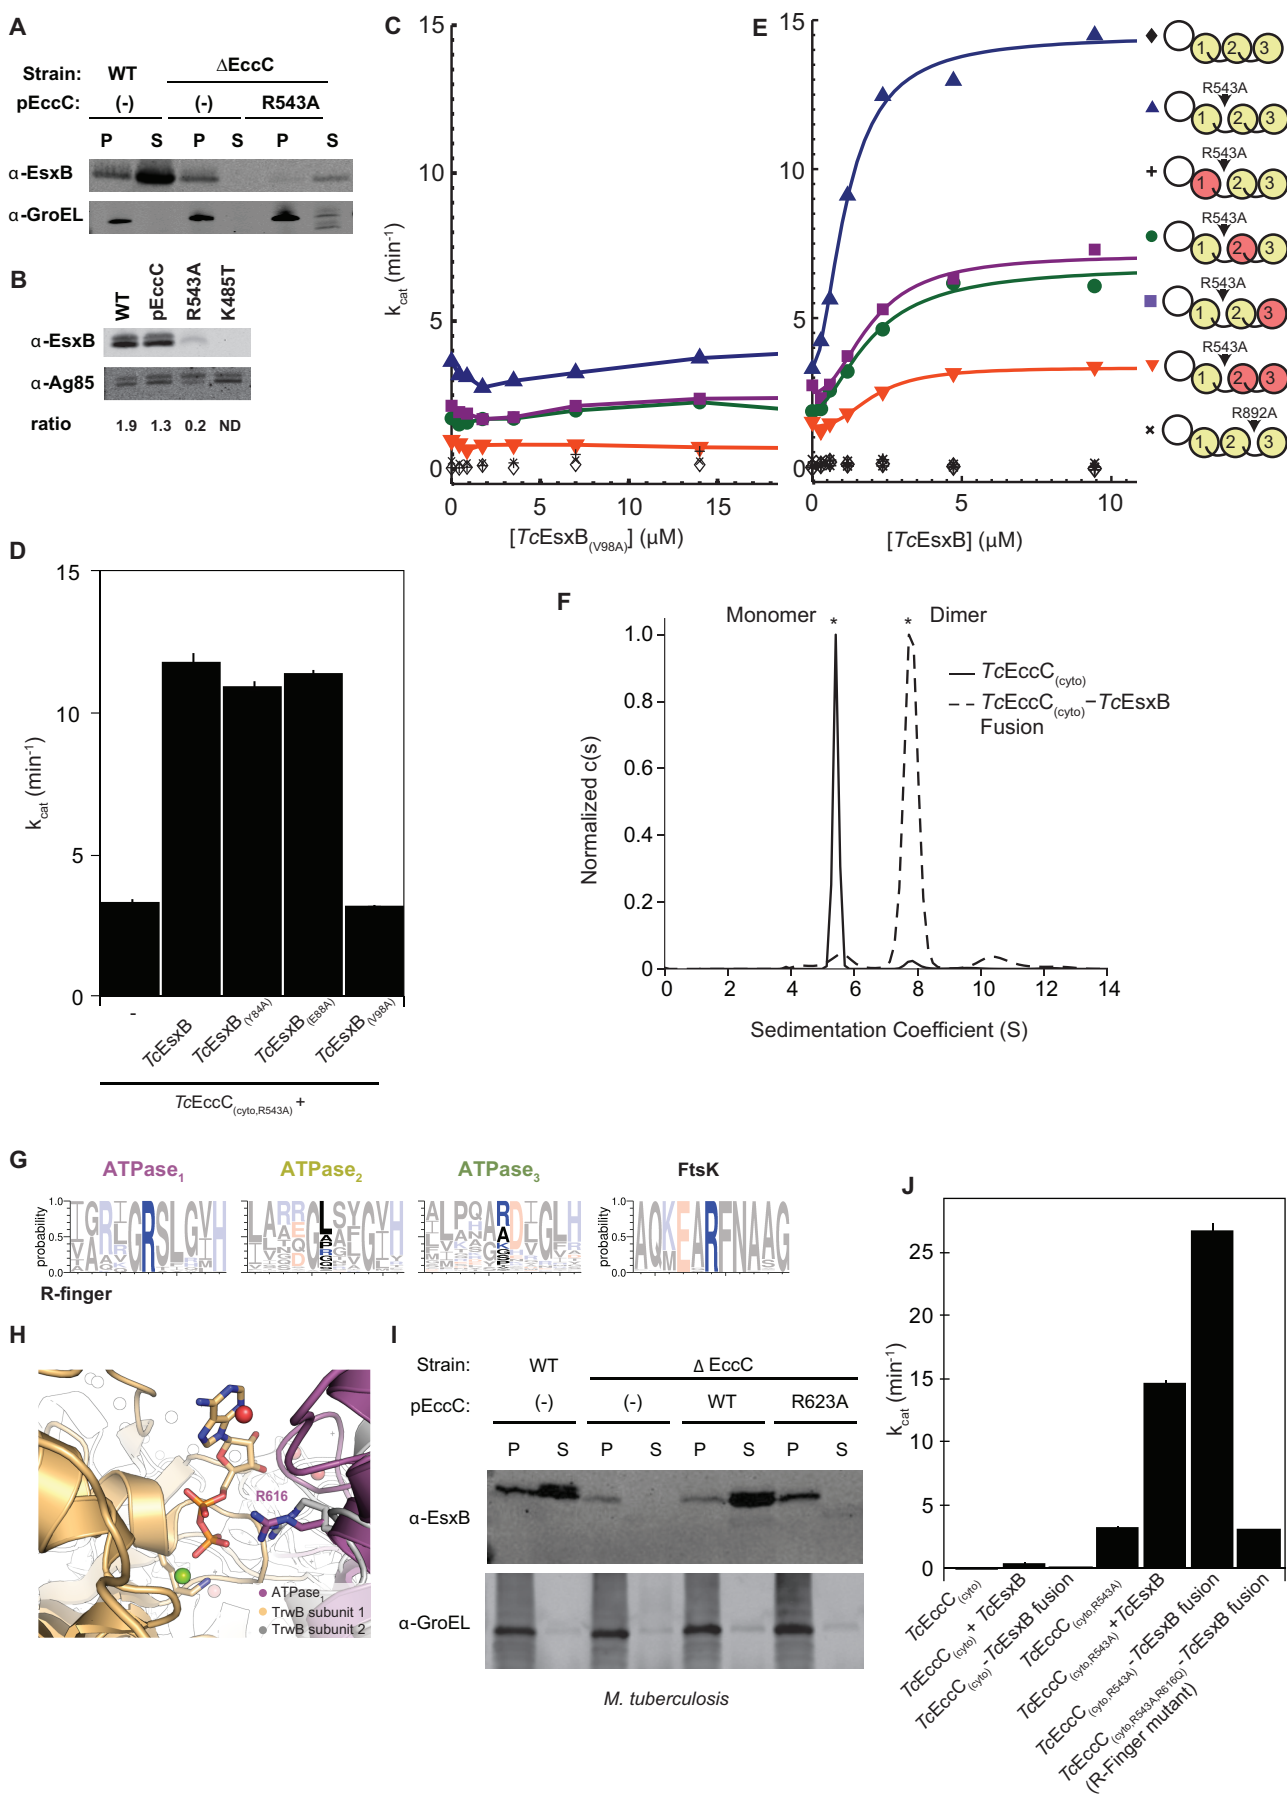

Supplement: NIHMS675969-supplement-5.pdf [file NIHMS675969-supplement-5.pdf]

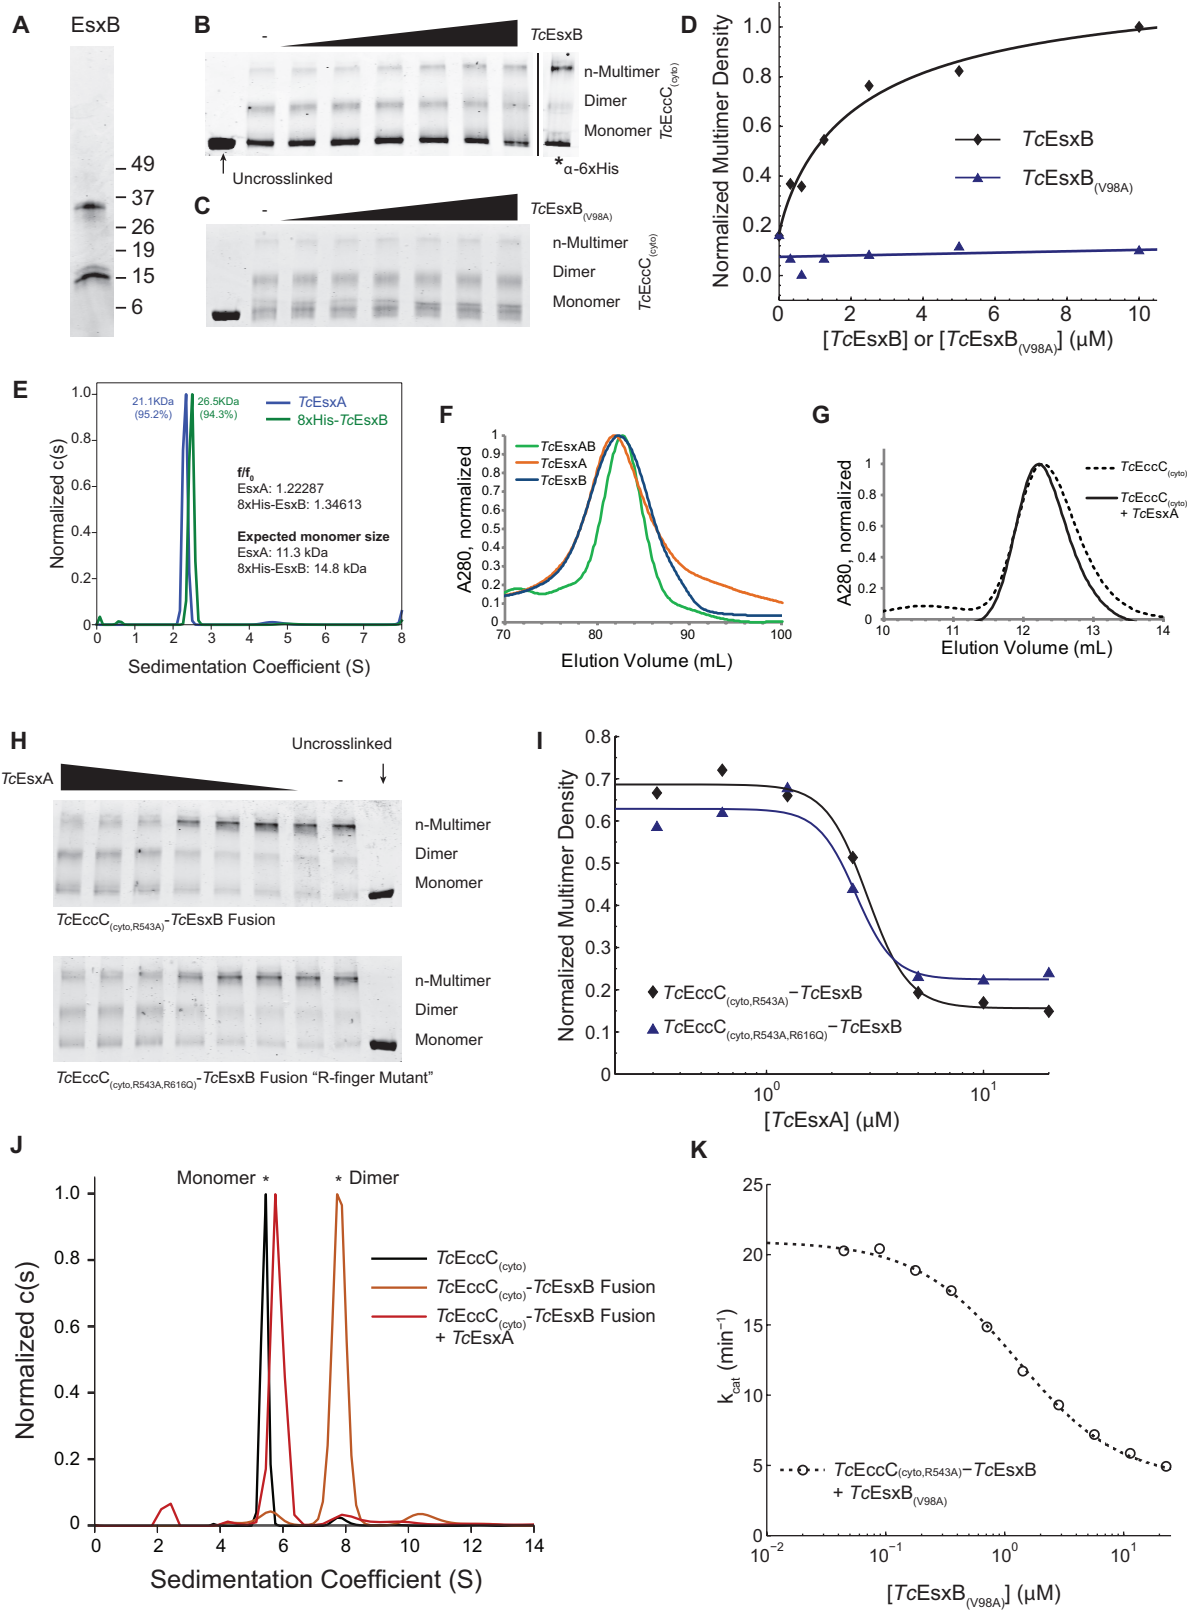

Supplement: NIHMS675969-supplement-6.pdf [file NIHMS675969-supplement-6.pdf]
